# Supplementary material
Source: ML conference proceedings conference paper supplement (https://openaccess.thecvf.com/content/CVPR2023/html/Veksler_Test_Time_Adaptation_CVPR_2023_paper.html)
Supplement: Supplementary file 1 [file Veksler_Test_Time_Adaptation_CVPR_2023_supplemental.pdf]

# Supplementary Materials: Test Time Adaptation with Regularized Loss for Weakly Supervised Salient Object Detection

First Author  
Institution1  
Institution1 address  
firstauthor@i1.org

Second Author  
Institution2  
First line of institution2 address  
secondauthor@i2.org

## 1. Additional Illustrations

In Fig. 2, we show the images from DUTO dataset for which test-time adaptation results in the largest improvement in accuracy. For all of these images, the initial segmentation, before test-time adaptation (column 3, iteration=0) is either empty or contains a much smaller object than the correct segmentation. Since our loss function penalizes objects that are too small, CNN, during test-time adaptation, is forced to come up with a reasonable size segmentation to improve the loss. Note, in particular, that for the top row, the initial segmentation is completely empty. With dense CRF post-processing [1], an empty solution will never improve to a non-empty one, since dense CRF has the smallest possible loss for the empty solution.

In Fig. 3, we show the image from DUTO dataset for which test-time adaptation results in a largest decline in accuracy. We show the original image, the ground truth, and the results after an increasing number of iterations. The initial segmentation (before test-time adaptation) detects mostly wrong areas, the fruits instead of the signs, as salient. Test-time iterations refine the fruit areas, resulting in a clean segmentation of the fruits, but the small areas of the signs that were detected initially as salient, get filtered out, resulting in a decreased  $F_\beta$  score.

More failure examples for our method are in Fig. 1.

## References

- [1] Philipp Krähenbühl and Vladlen Koltun. Efficient inference in fully connected crfs with gaussian edge potentials. In *Neural Information Processing Systems*, pages 109–117, 2011. 1

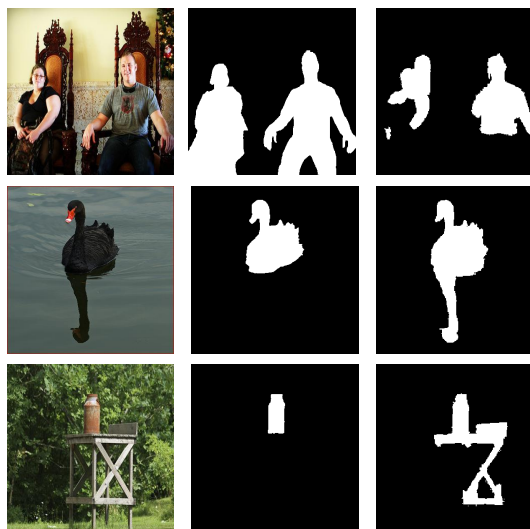

Figure 1. Some failure examples for our method. Left to right: input image, ground truth, our results.

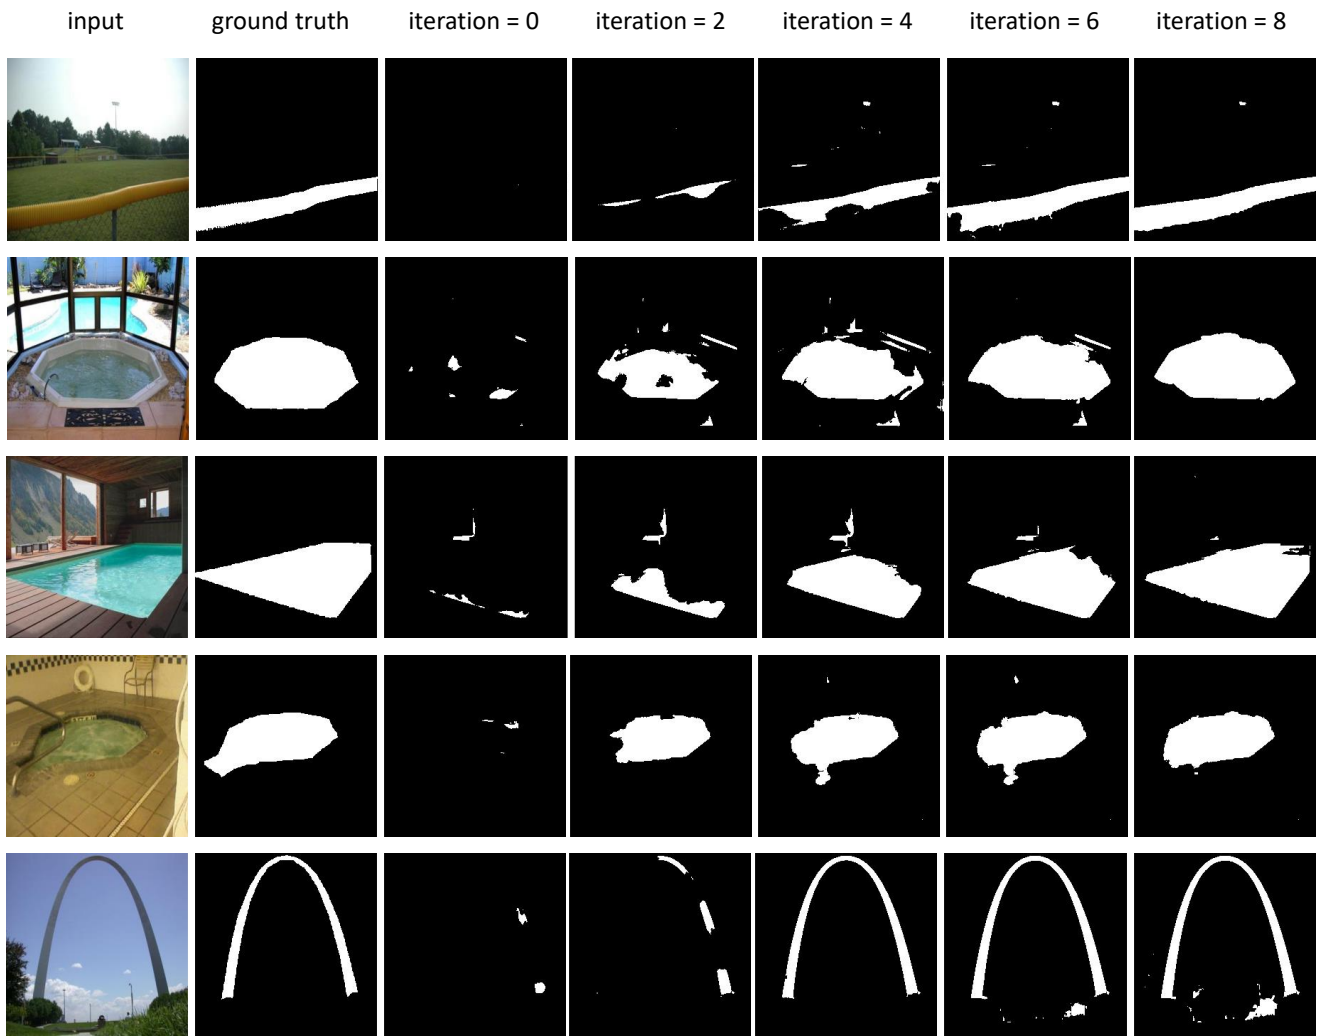

Figure 2. Images from DUTO dataset that improve the most. From left to right: input image, ground truth, and results after increasing number of iterations of test-time adaptation.

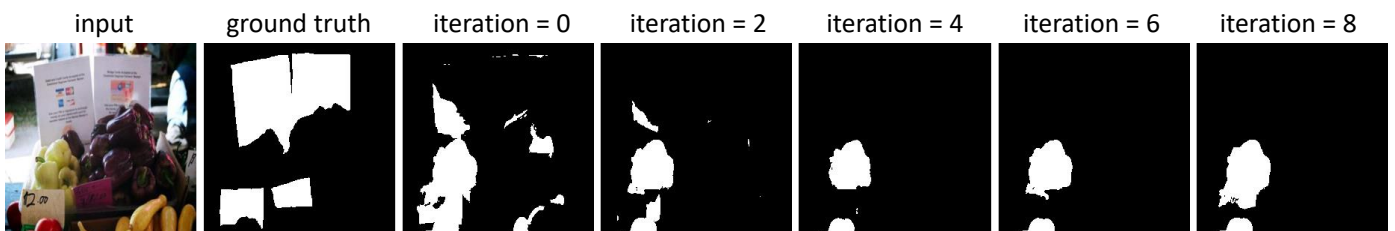

Figure 3. Image from DUTO dataset that degrades the most. From left to right: input image, ground truth, and results after increasing number of iterations of test-time adaptation.
